# Supplementary material for: The supply of multiple ecosystem services requires biodiversity across spatial scales
Source: Springer Nature journal article supplement (doi:10.1038/s41559-022-01918-5), 2022-11-14
Supplement: MOESM1 [file 41559_2022_1918_MOESM1_ESM.pdf]

# The supply of multiple ecosystem services requires biodiversity across spatial scales

---

In the format provided by the  
authors and unedited

1 **Supplementary Table 1.** Relative ecosystem service (ES) priority for each stakeholder group (local residents, nature conservation  
2 associations, agriculture and tourism sectors) for the four major ecosystem services supplied by grasslands within the study regions:  
3 aesthetic value (indicated by acoustic diversity and total flower cover), fodder production (shoot biomass and forage quality),  
4 biodiversity conservation (bird species richness) and carbon sequestration (i.e. soil carbon stocks). ES priority was calculated as the  
5 proportion of the total priority points allocated to the service within a social survey, averaged across the individual responses within  
6 each stakeholder group.

| Ecosystem service         | Indicators                              | Weightings for each stakeholder group |                                  |             |         |
|---------------------------|-----------------------------------------|---------------------------------------|----------------------------------|-------------|---------|
|                           |                                         | Local residents                       | Nature conservation associations | Agriculture | Tourism |
| Aesthetic value           | Acoustic diversity + Total flower cover | 0.26                                  | 0.18                             | 0.15        | 0.32    |
| Fodder production         | Shoot biomass + Forage quality          | 0.22                                  | 0.15                             | 0.49        | 0.16    |
| Biodiversity conservation | Bird species richness                   | 0.35                                  | 0.45                             | 0.26        | 0.34    |
| Carbon sequestration      | Soil carbon stocks                      | 0.17                                  | 0.22                             | 0.11        | 0.18    |

7 **Supplementary Table 2.** Current average proportion of the different land-cover types, and past average proportion of grasslands within  
 8 a 1000-m landscape of each grassland plot in the three Biodiversity Exploratories region.

|                                                 |                           | <b>Schwäbische<br/>Alb</b> | <b>Hainich-Dün</b> | <b>Schorfheide-<br/>Chorin</b> |
|-------------------------------------------------|---------------------------|----------------------------|--------------------|--------------------------------|
| <b>Current<br/>landscape-level<br/>land use</b> | % croplands               | 14.98                      | 34.29              | 24.70                          |
|                                                 | % grasslands              | 36.66                      | 30.03              | 45.85                          |
|                                                 | % forests                 | 41.41                      | 30.68              | 21.24                          |
|                                                 | % roads                   | 0.55                       | 0.62               | 0.73                           |
|                                                 | % urban areas             | 6.39                       | 4.35               | 4.60                           |
|                                                 | % water bodies            | 0.01                       | 0.03               | 2.88                           |
| <b>Past landscape-<br/>level land use</b>       | year 1820/50              | 30.34                      | 8.60               | 27.36                          |
|                                                 | % grasslands year 1910/30 | 26.56                      | 5.97               | 25.50                          |
|                                                 | year 1960                 | 30.82                      | 7.64               | 22.45                          |

9 **Supplementary Table 3. The values of  $\chi^2$  and  $R^2$  for the different structural equation models.**

10 Models were fitted to four multifunctionality measures: cultural, aboveground regulating and  
11 provisioning, and belowground regulating ecosystem service multifunctionality. Model fits were  
12 assessed using one-sided Chi-squared tests.  $\chi^2$  and P-values indicate whether the model covariance  
13 significantly differs from the observed one (non-significant P-values indicate good model fits).  
14 The  $R^2$  indicates the amount of variance in the cultural, aboveground regulating and provisioning,  
15 and belowground regulating ecosystem service multifunctionality explained by the model.  $n = 150$   
16 biologically independent samples.

| Multifunctionality measure                  | $\chi^2$     | P-value     | $R^2$       |
|---------------------------------------------|--------------|-------------|-------------|
| Cultural ecosystem services                 | <b>22.44</b> | <b>0.17</b> | <b>0.17</b> |
| Aboveground regulating ecosystem services   | <b>22.44</b> | <b>0.17</b> | <b>0.06</b> |
| Aboveground provisioning ecosystem services | <b>22.44</b> | <b>0.17</b> | <b>0.42</b> |
| Belowground regulating ecosystem services   | <b>22.44</b> | <b>0.17</b> | <b>0.17</b> |

## 17 **Supplementary references**

- 18 1. Villanueva-Rivera, L. J., Pijanowski, B. C., Doucette, J. & Pekin, B. A primer of acoustic  
19 analysis for landscape ecologists. *Landsc. Ecol.* **26**, 1233–1246 (2011).
- 20 2. Shaw, T., Müller, S. & Scherer-Lorenzen, M. Slope does not affect autonomous recorder  
21 detection shape: considerations for acoustic monitoring in forested landscapes. *Bioacoustics*  
22 **0**, 1–22 (2021).
- 23 3. Jäger E.J. & Werner K (2007). Gefässpflanzen Atlasband, 11th edn.n. Spektrum, Heidelberg.
- 24 4. Schauer T. & Caspari C. (2005). Der grosse BLV-Pflanzenführer, 9th edn. Blv, Munich.
- 25 5. Binkenstein, J., Renoult, J. P. & Schaefer, H. M. Increasing land-use intensity decreases floral  
26 colour diversity of plant communities in temperate grasslands. *Oecologia* **173**, 461–471  
27 (2013).
- 28 6. Steckel, J. *et al.* Landscape composition and configuration differently affect trap-nesting  
29 bees, wasps and their antagonists. *Biol. Conserv.* **172**, 56–64 (2014).
- 30 7. Frank, K., Hülsmann, M., Assmann, T., Schmitt, T. & Blüthgen, N. Land use affects dung  
31 beetle communities and their ecosystem service in forests and grasslands. *Agric. Ecosyst.*  
32 *Environ.* **243**, 114–122 (2017).
- 33 8. Klaus, V. H. *et al.* Nutrient concentrations and fibre contents of plant community biomass  
34 reflect species richness patterns along a broad range of land-use intensities among  
35 agricultural grasslands. *Perspect. Plant Ecol. Evol. Syst.* **13**, 287–295 (2011).
- 36 9. Rohweder, D., Barnes, R. F. & Jorgensen, N. Proposed hay grading standards based on  
37 laboratory analyses for evaluating quality. *J. Anim. Sci.* **47**, 747–759 (1978).
- 38 10. Oelmann, Y. *et al.* Above- and belowground biodiversity jointly tighten the P cycle in  
39 agricultural grasslands. *Nat. Commun.* **12**, 4431 (2021).

- 40 11. Sorkau, E. *et al.* The role of soil chemical properties, land use and plant diversity for  
41 microbial phosphorus in forest and grassland soils. *J. Plant Nutr. Soil Sci.* **181**, 185–197  
42 (2018).
- 43 12. Olsen, S. R. *Estimation of available phosphorus in soils by extraction with sodium*  
44 *bicarbonate*. (US Department of Agriculture, 1954).
- 45 13. Kleinebecker, T., Klaus, V. H. & Hölzel, N. Reducing sample quantity and maintaining high  
46 prediction quality of grassland biomass properties with near infrared reflectance  
47 spectroscopy. *J. Infrared Spectrosc.* **19**, 495–505 (2011).
- 48 14. Vance, E. D., Brookes, P. C. & Jenkinson, D. S. An extraction method for measuring soil  
49 microbial biomass C. *Soil Biol. Biochem.* **19**, 703–707 (1987).
- 50 15. Hoffmann, H., Schloter, M. & Wilke, B.-M. Microscale-scale measurement of potential  
51 nitrification rates of soil aggregates. *Biol. Fertil. Soils* **44**, 411–413 (2007).
- 52 16. Stempfhuber, B. *et al.* Drivers for ammonia-oxidation along a land-use gradient in grassland  
53 soils. *Soil Biol. Biochem.* **69**, 179–186 (2014).
- 54 17. Leimer, S. *et al.* Does plant diversity affect the water balance of established grassland  
55 systems? *Ecohydrology* **11**, e1945 (2018).
- 56 18. Leimer, S. *et al.* Plant diversity effects on the water balance of an experimental grassland.  
57 *Ecohydrology* **7**, 1378–1391 (2014).
